# Supplementary material for: A Qualitative Evaluation of the Acceptability of a Tailored Smartphone Alcohol Intervention for a Military Population: Information About Drinking for Ex-Serving Personnel (InDEx) App
Source: PubMed Central journal article supplement (PMC6555114; doi:10.2196/12267), 2019-05-24
Supplement: mhealth_v7i5e12267_app2.pdf [file mhealth_v7i5e12267_app2.pdf]

## **Appendix 1**

*Table 1: Demographic, alcohol use characteristics of participants and number of engagements with InDEx.*

| Participant ID and gender | Age range (years) | Years served in the military | AUDIT score at baseline of InDEx | Total units consumed in week one (median) | Total units consumed in week four (median) | Number of interactions with InDEx |
|---------------------------|-------------------|------------------------------|----------------------------------|-------------------------------------------|--------------------------------------------|-----------------------------------|
| Participant 1, male       | 40-44             | Over 12 years                | 11                               | 4.54                                      | 1.50                                       | 21                                |
| Participant 2, male       | 55-64             | Over 12 years                | 11                               | 10.22                                     | 7.95                                       | 35                                |
| Participant 3, male       | 50-54             | Over 12 years                | 10                               | 7.18                                      | 7.66                                       | 20                                |
| Participant 4, male       | 25-39             | Between 4 and 12 years       | 12                               | 3.25                                      | 6.00                                       | 22                                |
| Participant 5, male       | 55-64             | Over 12 years                | 7                                | 3.59                                      | 3.19                                       | 35                                |
| Participant 6, male       | 40-44             | Over 12 years                | 11                               | 12.00                                     | 2.00                                       | 16                                |
| Participant 7, female     | 40-44             | Less than 4 years            | 12                               | 9.75                                      | 6.81                                       | 20                                |
| Participant 8, female     | 40-44             | Over 12 years                | 12                               | 9.75                                      | 4.41                                       | 55                                |
| Participant 9, male       | 45-49             | Over 12 years                | 8                                | 10.08                                     | 6.00                                       | 38                                |
| Participant 10, male      | 50-54             | Over 12 years                | 12                               | 4.40                                      | 3.50                                       | 31                                |
| Participant 11, male      | 45-49             | Over 12 years                | 10                               | 7.19                                      | 6.27                                       | 39                                |
| Participant 12, male      | 40-44             | Over 12 years                | 11                               | 4.54                                      | 1.50                                       | 21                                |
| Participant 13, male      | 50-54             | Over 12 years                | 16                               | 9.39                                      | 3.14                                       | 29                                |
| Participant 14, male      | 55-64             | Over 12 years                | 10                               | 11.99                                     | 5.00                                       | 34                                |
| Participant 15, male      | 50-54             | Over 12 years                | 10                               | 8.00                                      | 6.00                                       | 11                                |

|                        |       |                        |    |       |      |    |
|------------------------|-------|------------------------|----|-------|------|----|
| Participant 16, male   | 25-39 | Between 4 and 12 years | 15 | 9.50  | 7.20 | 53 |
| Participant 17, male   | 50-54 | Over 12 years          | 12 | 16.00 | 5.74 | 42 |
| Participant 18, male   | 45-49 | Over 12 years          | 10 | 4.77  | 6.63 | 18 |
| Participant 19, male   | 55-64 | Over 12 years          | 11 | 5.68  | 2.74 | 50 |
| Participant 20, male   | 55-64 | Over 12 years          | 7  | 3.59  | 3.19 | 35 |
| Participant 21, male   | 40-44 | Over 12 years          | 14 | 6.81  | 9.00 | 45 |
| Participant 22, male   | 45-49 | Over 12 years          | 10 | 2.16  | 1.00 | 49 |
| Participant 23, male   | 25-39 | Over 12 years          | 14 | 13.92 | 6.17 | 28 |
| Participant 24, male   | 25-39 | Between 4 and 12 years | 10 | 4.54  | 9.19 | 48 |
| Participant 25, male   | 50-54 | Over 12 years          | 13 | 3.07  | 4.37 | 34 |
| Participant 26, female | 25-39 | Between 4 and 12 years | 5  | 3.89  | 1.62 | 29 |
| Participant 27, male   | 55-64 | Over 12 years          | 9  | 14.00 | 1.00 | 35 |
| Participant 28, male   | 55-64 | Over 12 years          | 14 | 5.86  | 3.13 | 46 |
| Participant 29, male   | 55-64 | Over 12 years          | 12 | 5.68  | 4.32 | 40 |
